# Supplementary material for: Effect of a Cross-Training and Resistance Exercise Routine on IL-15 in Adults with Type B Acute Lymphoblastic Leukemia during the Induction Phase: Randomized Pilot Study
Source: MDPI journal article supplement (doi:10.3390/jfmk9010004), 2023-12-21
Supplement: s1 [file s1]

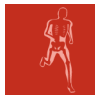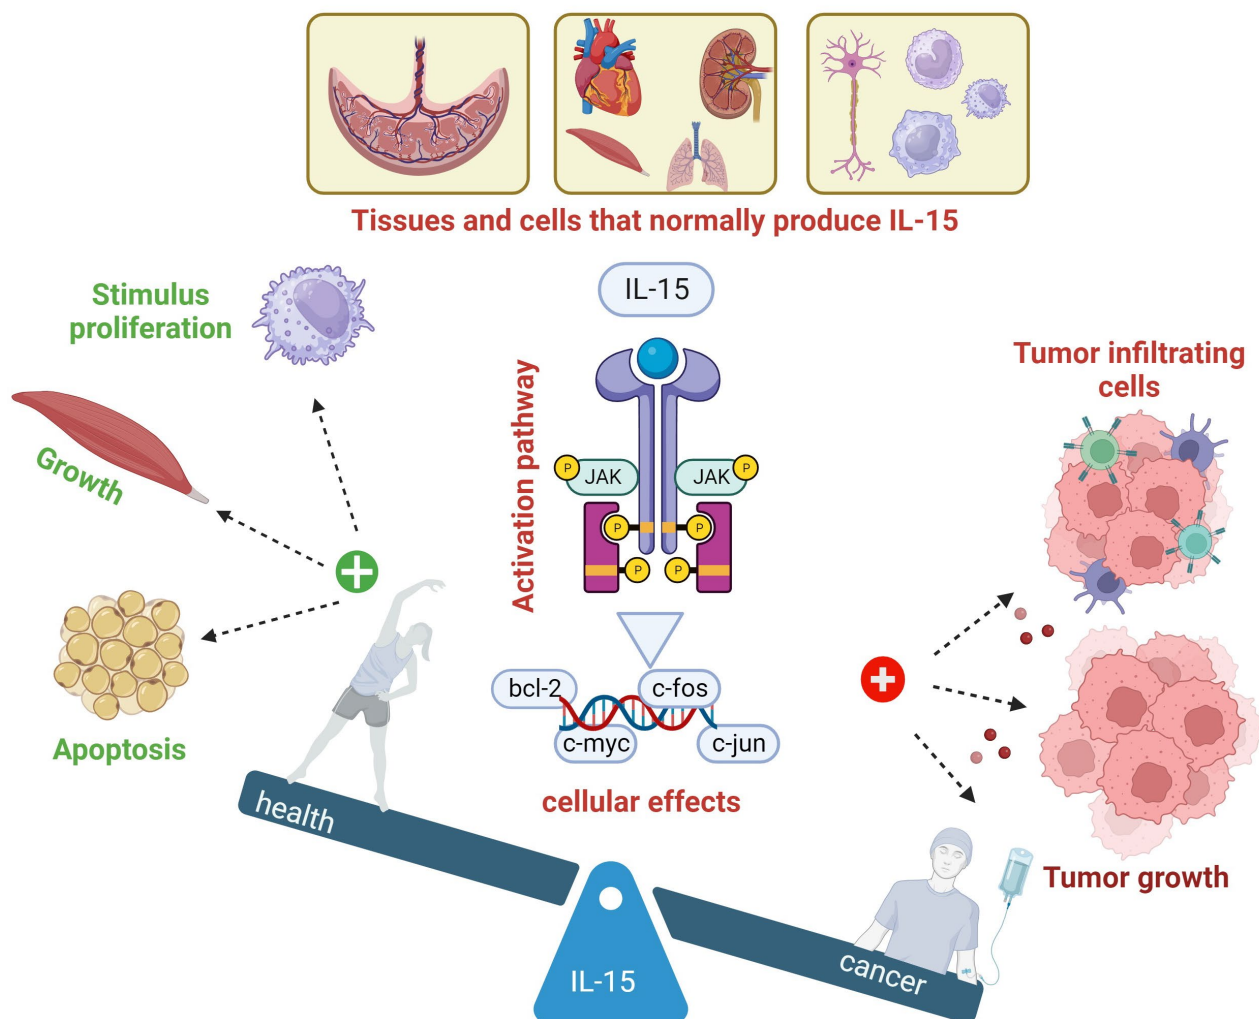

**Figure S1.** The role of IL-15 in energy metabolism, muscle growth, and its relationship with cancer and cellular components.
